# Supplementary material for: Misattribution of musical arousal increases sexual attraction towards opposite-sex faces in females
Source: PLoS One. 2017 Sep 11;12(9):e0183531. doi: 10.1371/journal.pone.0183531 (PMC5593195; doi:10.1371/journal.pone.0183531)
Supplement: S2 Table — (PDF) [file pone.0183531.s002.pdf]

S2 Table.

*Spearman's rank order correlations between average dating desirability ratings and age, mood, and musical background variables for three groups of participants.*

| Group              | Condition | Age   | Mood<br>pos.-neg. | Alertness/<br>fatigue | Quietude/<br>Disquietude | Yrs.<br>musical<br>training | Role of<br>music<br>in life | Liking of<br>piano solo<br>music |
|--------------------|-----------|-------|-------------------|-----------------------|--------------------------|-----------------------------|-----------------------------|----------------------------------|
| Fertile<br>women   |           |       |                   |                       |                          |                             |                             |                                  |
| <i>Df</i> = 38     | control   | -.187 | -.004             | -.123                 | -.328*                   | .350*                       | -.139                       | -.060                            |
|                    | music     | -.093 | .171              | -.030                 | -.265                    | .291                        | -.236                       | -.086                            |
| Infertile<br>women |           |       |                   |                       |                          |                             |                             |                                  |
| <i>Df</i> = 30     | control   | -.003 | .204              | .239                  | .303                     | .055                        | .065                        | .354*                            |
|                    | music     | -.072 | .017              | .282                  | .139                     | .138                        | -.039                       | .255                             |
| Men                |           |       |                   |                       |                          |                             |                             |                                  |
| <i>Df</i> = 38     | control   | -.278 | .132              | .098                  | .026                     | -.278                       | .074                        | .218                             |
|                    | music     | -.275 | .110              | .061                  | -.053                    | -.299                       | .032                        | .098                             |

*Note.* Correlations of notable strength are highlighted in grey. *Df* = degrees of freedom. Control = ratings for silent control condition; Music = ratings for averaged musical priming conditions. \*  $p < .05$ .
